# Supplementary material for: MuSiC: Identifying mutational significance in cancer genomes
Source: HighWire-hosted journal article supplement (doi:10.1101/gr.134635.111), 2012-07-03
Supplement: Supplemental_Material.docx [file Supplemental_Material.docx]

# Supplemental Material

## P-value Summarization Method Evaluations

Supplemental Figure 1:


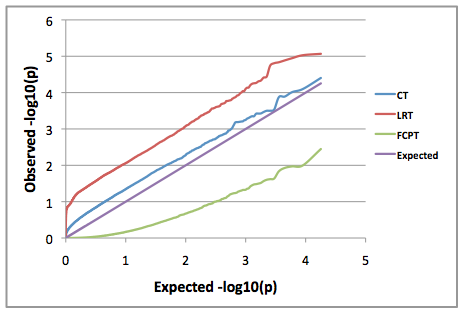


Supplemental Figure 1. Q-Q plots of three SMG test methods. *Q-Q plots of P-value (in -log10 scale) for the three SMG test methods, FCPT, LRT and CT. Plots are based on the analysis of mutation data of ~18000 genes simulated under the null hypothesis (i.e., MR = BMR). The mutation number of each mutation category in a gene was simulated according to a binomial distribution defined by coverage and BMR. BMRs of six mutation categories were estimated from real sequencing data of 316 ovarian cancer samples from the TCGA Research Network.*

## COSMIC/OMIM Analysis Results Summary

Supplemental Figure 2:


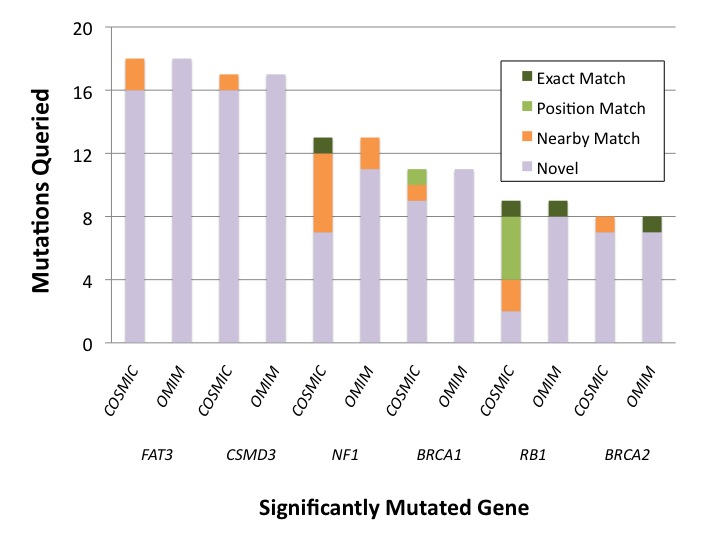


Supplemental Figure 2. COSMIC/OMIM database matches in significantly-mutated genes. *COSMIC/OMIM query summary is presented for BRCA1, BRCA2, CSMD3, FAT3, NF1, and RB1 (TP53 was excluded from the image due to the immense number of mutations). “Exact” matches were those OV mutations already identically reported in the databases. “Position” matches occur where newly-found variants match the position of a variant in the database, but where the new variant does not have the exact same base- or amino-acid-change. “Nearby” matches indicate that variants in the databases are within 2 amino acids or 5 base pairs of the queried variant. “Novel” variants are those that are not previously reported in COSMIC or OMIM.*

## Frequently Mutated Pfam Domains

Supplemental Table 1:

| **Pfam Domain** | **Mutations (#)** | **Mutated Genes (#)** | **Non-synonymous Mutations (#)** | **Synonymous Mutations (#)** | **% of Mutations Non-synonymous** |
| --- | --- | --- | --- | --- | --- |
| HMMPfam_7tm_1 | 464 | 326 | 348 | 116 | 75 |
| HMMPfam_P53 | 254 | 3 | 252 | 2 | 99 |
| HMMPfam_Pkinase | 239 | 183 | 198 | 41 | 83 |
| HMMPfam_zf-C2H2 | 204 | 166 | 168 | 36 | 82 |
| HMMPfam_Cadherin | 195 | 84 | 147 | 48 | 75 |
| HMMPfam_I-set | 119 | 49 | 89 | 30 | 75 |
| HMMPfam_fn3 | 116 | 60 | 84 | 32 | 72 |
| HMMPfam_Ion_trans | 105 | 62 | 72 | 33 | 69 |
| HMMPfam_Ank | 87 | 62 | 69 | 18 | 79 |
| HMMPfam_La | 75 | 37 | 64 | 11 | 85 |
| HMMPfam_V-set | 73 | 67 | 61 | 12 | 84 |
| HMMPfam_p450 | 69 | 39 | 54 | 15 | 78 |
| HMMPfam_Collagen | 67 | 32 | 57 | 10 | 85 |
| HMMPfam_PH | 67 | 58 | 55 | 12 | 82 |
| HMMPfam_ig | 65 | 51 | 50 | 15 | 77 |
| HMMPfam_PA | 64 | 51 | 49 | 15 | 77 |
| HMMPfam_Pkinase_Tyr | 60 | 46 | 48 | 12 | 80 |
| HMMPfam_EGF | 58 | 33 | 41 | 17 | 71 |
| HMMPfam_MFS_1 | 57 | 31 | 37 | 20 | 65 |
| HMMPfam_Ras | 56 | 49 | 51 | 5 | 91 |
| HMMPfam_C2 | 51 | 40 | 40 | 11 | 78 |
| HMMPfam_Peptidase_M1 | 51 | 31 | 39 | 12 | 76 |
| HMMPfam_Spectrin | 50 | 17 | 45 | 5 | 90 |
| HMMPfam_WD40 | 50 | 43 | 42 | 8 | 84 |
| HMMPfam_Myosin_head | 50 | 24 | 41 | 9 | 82 |
| HMMPfam_Trypsin | 48 | 39 | 41 | 7 | 85 |
| HMMPfam_Filament | 47 | 36 | 31 | 16 | 66 |
| HMMPfam_Sushi | 45 | 23 | 36 | 9 | 80 |
| HMMPfam_VWA | 38 | 24 | 33 | 5 | 87 |
| HMMPfam_CUB | 38 | 18 | 30 | 8 | 79 |
| HMMPfam_Myosin_tail_1 | 37 | 13 | 28 | 9 | 76 |
| HMMPfam_SNF | 35 | 21 | 25 | 10 | 71 |
| HMMPfam_RRM_1 | 34 | 28 | 26 | 8 | 76 |
| HMMPfam_ANF_receptor | 34 | 19 | 23 | 11 | 68 |
| HMMPfam_LRR_1 | 34 | 28 | 21 | 13 | 62 |
| HMMPfam_UCH | 33 | 26 | 24 | 9 | 73 |
| HMMPfam_Homeobox | 31 | 29 | 24 | 7 | 77 |
| HMMPfam_Laminin_G_2 | 30 | 18 | 25 | 5 | 83 |
| HMMPfam_PDZ | 30 | 23 | 21 | 9 | 70 |
| HMMPfam_EGF_CA | 30 | 16 | 19 | 11 | 63 |
| HMMPfam_Serpin | 29 | 20 | 25 | 4 | 86 |
| HMMPfam_BTB | 29 | 26 | 23 | 6 | 79 |
| HMMPfam_TSP_1 | 29 | 19 | 21 | 8 | 72 |
| HMMPfam_Neur_chan_memb | 28 | 19 | 23 | 5 | 82 |
| HMMPfam_Y_phosphatase | 27 | 17 | 21 | 6 | 78 |
| HMMPfam_Tub | 26 | 19 | 19 | 7 | 73 |
| HMMPfam_Actin | 25 | 16 | 22 | 3 | 88 |
| HMMPfam_FA | 25 | 20 | 20 | 5 | 80 |
| HMMPfam_UDPGT | 25 | 16 | 19 | 6 | 76 |
| HMMPfam_Kelch_1 | 25 | 22 | 19 | 6 | 76 |
| HMMPfam_RhoGEF | 25 | 19 | 18 | 7 | 72 |
| HMMPfam_Neur_chan_LBD | 25 | 19 | 16 | 9 | 64 |
| HMMPfam_KRAB | 24 | 22 | 22 | 2 | 92 |
| HMMPfam_SRCR | 24 | 10 | 20 | 4 | 83 |
| HMMPfam_SPRY | 24 | 22 | 19 | 5 | 79 |
| HMMPfam_Ldl_recept_b | 23 | 6 | 21 | 2 | 91 |
| HMMPfam_wnt | 23 | 12 | 18 | 5 | 78 |
| HMMPfam_Tubulin | 23 | 16 | 16 | 7 | 70 |
| HMMPfam_Sema | 23 | 17 | 16 | 7 | 70 |
| HMMPfam_Hydrolase | 22 | 17 | 18 | 4 | 82 |
| HMMPfam_SH3_1 | 22 | 20 | 16 | 6 | 73 |
| HMMPfam_COesterase | 21 | 10 | 20 | 1 | 95 |
| HMMPfam_CH | 21 | 18 | 19 | 2 | 90 |
| HMMPfam_TPR_1 | 21 | 19 | 17 | 4 | 81 |
| HMMPfam_ABC_tran | 21 | 14 | 15 | 6 | 71 |
| HMMPfam_AMP-binding | 21 | 18 | 15 | 6 | 71 |
| HMMPfam_OATP | 21 | 10 | 14 | 7 | 67 |
| HMMPfam_Laminin_EGF | 20 | 11 | 17 | 3 | 85 |
| HMMPfam_zf-C3HC4 | 20 | 19 | 17 | 3 | 85 |
| HMMPfam_TB | 20 | 16 | 16 | 4 | 80 |
| HMMPfam_SH2 | 19 | 15 | 18 | 1 | 95 |
| HMMPfam_LBP_BPI_CETP | 19 | 8 | 15 | 4 | 79 |
| HMMPfam_7tm_2 | 19 | 14 | 15 | 4 | 79 |
| HMMPfam_SMC_N | 19 | 7 | 14 | 5 | 74 |
| HMMPfam_Patched | 19 | 8 | 14 | 5 | 74 |
| HMMPfam_AAA | 19 | 19 | 14 | 5 | 74 |
| HMMPfam_Tetraspannin | 19 | 16 | 13 | 6 | 68 |
| HMMPfam_ABC_membrane | 18 | 11 | 15 | 3 | 83 |
| HMMPfam_Arf | 18 | 16 | 15 | 3 | 83 |
| HMMPfam_FERM_M | 18 | 17 | 15 | 3 | 83 |
| HMMPfam_PMP22_Claudin | 18 | 13 | 14 | 4 | 78 |
| HMMPfam_AA_permease | 18 | 15 | 14 | 4 | 78 |
| HMMPfam_TIG | 18 | 11 | 12 | 6 | 67 |
| HMMPfam_Dynein_heavy | 17 | 12 | 17 | 0 | 100 |
| HMMPfam_Lipase | 17 | 11 | 15 | 2 | 88 |
| HMMPfam_HECT | 17 | 12 | 14 | 3 | 82 |
| HMMPfam_Kinesin | 17 | 14 | 13 | 4 | 76 |
| HMMPfam_Peptidase_M14 | 17 | 12 | 12 | 5 | 71 |
| HMMPfam_Sugar_tr | 17 | 13 | 12 | 5 | 71 |
| HMMPfam_Peptidase_C1 | 16 | 12 | 14 | 2 | 88 |
| HMMPfam_RasGEF | 16 | 13 | 14 | 2 | 88 |
| HMMPfam_Aa_trans | 16 | 9 | 13 | 3 | 81 |
| HMMPfam_efhand | 16 | 16 | 13 | 3 | 81 |
| HMMPfam_Carb_anhydrase | 16 | 12 | 12 | 4 | 75 |
| HMMPfam_Lig_chan | 16 | 12 | 9 | 7 | 56 |
| HMMPfam_IRK | 15 | 10 | 13 | 2 | 87 |
| HMMPfam_Histone | 15 | 13 | 11 | 4 | 73 |
| HMMPfam_Guanylate_cyc | 15 | 9 | 9 | 6 | 60 |
| HMMPfam_Ephrin | 15 | 11 | 9 | 6 | 60 |
| HMMPfam_LIM | 15 | 15 | 9 | 6 | 60 |
| HMMPfam_C1-set | 14 | 11 | 14 | 0 | 100 |
| HMMPfam_G-alpha | 14 | 10 | 13 | 1 | 93 |
| HMMPfam_Adaptin_N | 14 | 8 | 12 | 2 | 86 |
| HMMPfam_Ldl_recept_a | 14 | 8 | 12 | 2 | 86 |
| HMMPfam_DUF6 | 14 | 13 | 12 | 2 | 86 |
| HMMPfam_DEAD | 14 | 14 | 12 | 2 | 86 |
| HMMPfam_Hormone_recep | 14 | 14 | 12 | 2 | 86 |
| HMMPfam_MAGE | 14 | 14 | 10 | 4 | 71 |
| HMMPfam_Ephrin_lbd | 14 | 10 | 9 | 5 | 64 |
| HMMPfam_Cpn60_TCP1 | 13 | 7 | 12 | 1 | 92 |
| HMMPfam_TAS2R | 13 | 9 | 12 | 1 | 92 |
| HMMPfam_tRNA-synt_2 | 13 | 10 | 12 | 1 | 92 |
| HMMPfam_Peptidase_M2 | 13 | 7 | 11 | 2 | 85 |
| HMMPfam_Glyco_hydro_1 | 13 | 6 | 10 | 3 | 77 |
| HMMPfam_HCO3_cotransp | 13 | 8 | 10 | 3 | 77 |
| HMMPfam_Reprolysin | 13 | 8 | 10 | 3 | 77 |
| HMMPfam_TBC | 13 | 11 | 10 | 3 | 77 |
| HMMPfam_RhoGAP | 13 | 13 | 10 | 3 | 77 |
| HMMPfam_GTP_EFTU | 13 | 11 | 9 | 4 | 69 |
| HMMPfam_Sulfotransfer_1 | 13 | 11 | 9 | 4 | 69 |
| HMMPfam_SNF2_N | 13 | 8 | 8 | 5 | 62 |
| HMMPfam_ASC | 12 | 7 | 11 | 1 | 92 |
| HMMPfam_Glyco_transf_29 | 12 | 8 | 11 | 1 | 92 |
| HMMPfam_Mito_carr | 12 | 10 | 11 | 1 | 92 |
| HMMPfam_Peptidase_M13 | 12 | 6 | 10 | 2 | 83 |
| HMMPfam_7tm_3 | 12 | 10 | 10 | 2 | 83 |
| HMMPfam_F5_F8_type_C | 12 | 8 | 9 | 3 | 75 |
| HMMPfam_Helicase_C | 12 | 12 | 9 | 3 | 75 |
| HMMPfam_Pyr_redox_2 | 12 | 7 | 8 | 4 | 67 |
| HMMPfam_SSF | 12 | 8 | 8 | 4 | 67 |
| HMMPfam_Aldo_ket_red | 12 | 7 | 7 | 5 | 58 |
| HMMPfam_tRNA-synt_1 | 11 | 7 | 10 | 1 | 91 |
| HMMPfam_Abhydrolase_1 | 11 | 7 | 9 | 2 | 82 |
| HMMPfam_RGS | 11 | 9 | 9 | 2 | 82 |
| HMMPfam_Cadherin_2 | 11 | 10 | 9 | 2 | 82 |
| HMMPfam_SAM_2 | 11 | 11 | 9 | 2 | 82 |
| HMMPfam_Aldedh | 11 | 7 | 8 | 3 | 73 |
| HMMPfam_NAC | 11 | 8 | 8 | 3 | 73 |
| HMMPfam_HSP70 | 11 | 7 | 7 | 4 | 64 |
| HMMPfam_E1-E2_ATPase | 11 | 11 | 7 | 4 | 64 |
| HMMPfam_P53_tetramer | 10 | 1 | 10 | 0 | 100 |
| HMMPfam_DSPc | 10 | 6 | 9 | 1 | 90 |
| HMMPfam_LBP_BPI_CETP_C | 10 | 6 | 9 | 1 | 90 |
| HMMPfam_Sec6 | 10 | 7 | 9 | 1 | 90 |
| HMMPfam_Fibrinogen_C | 10 | 8 | 9 | 1 | 90 |
| HMMPfam_Integrin_alpha2 | 10 | 9 | 9 | 1 | 90 |
| HMMPfam_zf-C4 | 10 | 9 | 9 | 1 | 90 |
| HMMPfam_Glyco_hydro_38 | 10 | 4 | 8 | 2 | 80 |
| HMMPfam_Zip | 10 | 6 | 8 | 2 | 80 |
| HMMPfam_Bromodomain | 10 | 7 | 8 | 2 | 80 |
| HMMPfam_PX | 10 | 10 | 8 | 2 | 80 |
| HMMPfam_Hemopexin | 10 | 8 | 7 | 3 | 70 |
| HMMPfam_Interferon | 10 | 8 | 7 | 3 | 70 |
| HMMPfam_Aminotran_1_2 | 10 | 8 | 6 | 4 | 60 |
| HMMPfam_Tubulin_C | 10 | 8 | 6 | 4 | 60 |
| HMMPfam_Lectin_C | 10 | 10 | 6 | 4 | 60 |
| HMMPfam_C1_1 | 10 | 8 | 5 | 5 | 50 |
| HMMPfam_CHGN | 9 | 6 | 9 | 0 | 100 |
| HMMPfam_FH2 | 9 | 6 | 9 | 0 | 100 |
| HMMPfam_Galactosyl_T | 9 | 7 | 9 | 0 | 100 |
| HMMPfam_UPF0560 | 9 | 2 | 8 | 1 | 89 |
| HMMPfam_DP | 9 | 4 | 8 | 1 | 89 |
| HMMPfam_PAD | 9 | 5 | 8 | 1 | 89 |
| HMMPfam_DAGAT | 9 | 6 | 8 | 1 | 89 |
| HMMPfam_An_peroxidase | 9 | 8 | 8 | 1 | 89 |
| HMMPfam_C2-set | 9 | 8 | 8 | 1 | 89 |
| HMMPfam_IL1 | 9 | 8 | 8 | 1 | 89 |
| HMMPfam_MHC_I | 9 | 8 | 8 | 1 | 89 |
| HMMPfam_PAS | 9 | 8 | 8 | 1 | 89 |
| HMMPfam_AF-4 | 9 | 3 | 7 | 2 | 78 |
| HMMPfam_DAO | 9 | 5 | 7 | 2 | 78 |
| HMMPfam_Amidase | 9 | 6 | 7 | 2 | 78 |
| HMMPfam_DUF221 | 9 | 6 | 7 | 2 | 78 |
| HMMPfam_Peptidase_M13_N | 9 | 6 | 7 | 2 | 78 |
| HMMPfam_Sulfatase | 9 | 6 | 7 | 2 | 78 |
| HMMPfam_Fork_head | 9 | 8 | 7 | 2 | 78 |
| HMMPfam_NACHT | 9 | 6 | 6 | 3 | 67 |
| HMMPfam_CD20 | 9 | 7 | 6 | 3 | 67 |
| HMMPfam_DUF21 | 9 | 7 | 6 | 3 | 67 |
| HMMPfam_Na_H_Exchanger | 9 | 7 | 6 | 3 | 67 |
| HMMPfam_PI3_PI4_kinase | 9 | 7 | 6 | 3 | 67 |
| HMMPfam_ADAM_spacer1 | 9 | 8 | 6 | 3 | 67 |
| HMMPfam_DUF590 | 9 | 8 | 6 | 3 | 67 |
| HMMPfam_PARP | 9 | 8 | 6 | 3 | 67 |
| HMMPfam_HLH | 9 | 8 | 5 | 4 | 56 |
| HMMPfam_Metallophos | 9 | 8 | 4 | 5 | 44 |
| HMMPfam_GAF | 8 | 6 | 8 | 0 | 100 |
| HMMPfam_Lipocalin | 8 | 6 | 8 | 0 | 100 |
| HMMPfam_T-box | 8 | 6 | 8 | 0 | 100 |
| HMMPfam_GBP | 8 | 7 | 8 | 0 | 100 |
| HMMPfam_SET | 8 | 7 | 8 | 0 | 100 |
| HMMPfam_IQ | 8 | 8 | 8 | 0 | 100 |
| HMMPfam_DPPIV_N | 8 | 3 | 7 | 1 | 88 |
| HMMPfam_Peptidase_M16 | 8 | 4 | 7 | 1 | 88 |
| HMMPfam_Plexin_cytopl | 8 | 4 | 7 | 1 | 88 |
| HMMPfam_Cullin | 8 | 5 | 7 | 1 | 88 |
| HMMPfam_DHC_N2 | 8 | 6 | 7 | 1 | 88 |
| HMMPfam_Laminin_N | 8 | 6 | 7 | 1 | 88 |
| HMMPfam_SAM_1 | 8 | 6 | 7 | 1 | 88 |
| HMMPfam_Sec7 | 8 | 6 | 7 | 1 | 88 |
| HMMPfam_C2-set_2 | 8 | 7 | 7 | 1 | 88 |
| HMMPfam_Gelsolin | 8 | 7 | 7 | 1 | 88 |
| HMMPfam_K_tetra | 8 | 7 | 7 | 1 | 88 |
| HMMPfam_PDEase_I | 8 | 7 | 7 | 1 | 88 |
| HMMPfam_RA | 8 | 7 | 7 | 1 | 88 |
| HMMPfam_Nebulin | 8 | 3 | 6 | 2 | 75 |
| HMMPfam_Glyco_hydro_31 | 8 | 4 | 6 | 2 | 75 |
| HMMPfam_PK | 8 | 4 | 6 | 2 | 75 |
| HMMPfam_Serum_albumin | 8 | 4 | 6 | 2 | 75 |
| HMMPfam_Cadherin_C | 8 | 5 | 6 | 2 | 75 |
| HMMPfam_VWD | 8 | 5 | 6 | 2 | 75 |
| HMMPfam_TTL | 8 | 6 | 6 | 2 | 75 |
| HMMPfam_Ion_trans_2 | 8 | 7 | 6 | 2 | 75 |
| HMMPfam_Filamin | 8 | 4 | 5 | 3 | 63 |
| HMMPfam_Frizzled | 8 | 4 | 5 | 3 | 63 |
| HMMPfam_STAS | 8 | 5 | 5 | 3 | 63 |
| HMMPfam_TGFb_propeptide | 8 | 7 | 5 | 3 | 63 |
| HMMPfam_SH3_2 | 8 | 8 | 5 | 3 | 63 |
| HMMPfam_Ets | 8 | 7 | 4 | 4 | 50 |
| HMMPfam_PID | 8 | 6 | 3 | 5 | 38 |
| HMMPfam_Cu_amine_oxid | 7 | 3 | 7 | 0 | 100 |
| HMMPfam_Linker_histone | 7 | 4 | 7 | 0 | 100 |
| HMMPfam_Acyltransferase | 7 | 5 | 7 | 0 | 100 |
| HMMPfam_Kazal_2 | 7 | 5 | 7 | 0 | 100 |
| HMMPfam_MATH | 7 | 5 | 7 | 0 | 100 |
| HMMPfam_adh_short | 7 | 6 | 7 | 0 | 100 |
| HMMPfam_Arm | 7 | 7 | 7 | 0 | 100 |
| HMMPfam_Syndecan | 7 | 3 | 6 | 1 | 86 |
| HMMPfam_Carn_acyltransf | 7 | 4 | 6 | 1 | 86 |
| HMMPfam_Oxysterol_BP | 7 | 4 | 6 | 1 | 86 |
| HMMPfam_Peptidase_S8 | 7 | 4 | 6 | 1 | 86 |
| HMMPfam_Sec63 | 7 | 4 | 6 | 1 | 86 |
| HMMPfam_A_deamin | 7 | 5 | 6 | 1 | 86 |
| HMMPfam_Zona_pellucida | 7 | 5 | 6 | 1 | 86 |
| HMMPfam_DUF634 | 7 | 6 | 6 | 1 | 86 |
| HMMPfam_Peptidase_C14 | 7 | 6 | 6 | 1 | 86 |
| HMMPfam_SCP | 7 | 6 | 6 | 1 | 86 |
| HMMPfam_OLF | 7 | 7 | 6 | 1 | 86 |
| HMMPfam_cNMP_binding | 7 | 7 | 6 | 1 | 86 |
| HMMPfam_Asp | 7 | 4 | 5 | 2 | 71 |
| HMMPfam_DUF1669 | 7 | 4 | 5 | 2 | 71 |
| HMMPfam_DHC_N1 | 7 | 5 | 5 | 2 | 71 |
| HMMPfam_Kringle | 7 | 5 | 5 | 2 | 71 |
| HMMPfam_BAR | 7 | 6 | 5 | 2 | 71 |
| HMMPfam_MIP | 7 | 6 | 5 | 2 | 71 |
| HMMPfam_Peptidase_C2 | 7 | 6 | 5 | 2 | 71 |
| HMMPfam_COLFI | 7 | 7 | 5 | 2 | 71 |
| HMMPfam_TIM | 7 | 2 | 4 | 3 | 57 |
| HMMPfam_Spc97_Spc98 | 7 | 3 | 4 | 3 | 57 |
| HMMPfam_Proteasome | 7 | 5 | 4 | 3 | 57 |
| HMMPfam_Sec1 | 7 | 5 | 4 | 3 | 57 |
| HMMPfam_A2M_comp | 7 | 6 | 4 | 3 | 57 |
| HMMPfam_Pep_M12B_propep | 7 | 6 | 4 | 3 | 57 |
| HMMPfam_RHD | 7 | 6 | 4 | 3 | 57 |
| HMMPfam_AAA_5 | 7 | 7 | 4 | 3 | 57 |
| HMMPfam_SCAN | 7 | 7 | 4 | 3 | 57 |
| HMMPfam_Hist_deacetyl | 7 | 5 | 3 | 4 | 43 |
| HMMPfam_Glycos_transf_2 | 7 | 7 | 3 | 4 | 43 |
| HMMPfam_FragX_IP | 6 | 2 | 6 | 0 | 100 |
| HMMPfam_Hexokinase_1 | 6 | 4 | 6 | 0 | 100 |
| HMMPfam_2OG-FeII_Oxy | 6 | 5 | 6 | 0 | 100 |
| HMMPfam_IL8 | 6 | 5 | 6 | 0 | 100 |
| HMMPfam_MBOAT | 6 | 5 | 6 | 0 | 100 |
| HMMPfam_RUN | 6 | 5 | 6 | 0 | 100 |
| HMMPfam_Transket_pyr | 6 | 5 | 6 | 0 | 100 |
| HMMPfam_RnaseA | 6 | 6 | 6 | 0 | 100 |
| HMMPfam_A2M_N | 6 | 2 | 5 | 1 | 83 |
| HMMPfam_DUF906 | 6 | 2 | 5 | 1 | 83 |
| HMMPfam_Gal-3-0_sulfotr | 6 | 2 | 5 | 1 | 83 |
| HMMPfam_PKD | 6 | 2 | 5 | 1 | 83 |
| HMMPfam_Prominin | 6 | 2 | 5 | 1 | 83 |
| HMMPfam_PHK_AB | 6 | 3 | 5 | 1 | 83 |
| HMMPfam_Branch | 6 | 4 | 5 | 1 | 83 |
| HMMPfam_DUF1220 | 6 | 4 | 5 | 1 | 83 |
| HMMPfam_MAM | 6 | 4 | 5 | 1 | 83 |
| HMMPfam_Peptidase_M16_C | 6 | 4 | 5 | 1 | 83 |
| HMMPfam_RasGEF_N | 6 | 4 | 5 | 1 | 83 |
| HMMPfam_C1q | 6 | 5 | 5 | 1 | 83 |
| HMMPfam_CARD | 6 | 5 | 5 | 1 | 83 |
| HMMPfam_IRF | 6 | 5 | 5 | 1 | 83 |
| HMMPfam_PAAD_DAPIN | 6 | 5 | 5 | 1 | 83 |
| HMMPfam_PI-PLC-Y | 6 | 5 | 5 | 1 | 83 |
| HMMPfam_Phosphodiest | 6 | 5 | 5 | 1 | 83 |
| HMMPfam_BACK | 6 | 6 | 5 | 1 | 83 |
| HMMPfam_Death | 6 | 6 | 5 | 1 | 83 |
| HMMPfam_MARVEL | 6 | 6 | 5 | 1 | 83 |
| HMMPfam_SEA | 6 | 3 | 4 | 2 | 67 |
| HMMPfam_Amidohydro_1 | 6 | 5 | 4 | 2 | 67 |
| HMMPfam_Dynamin_N | 6 | 5 | 4 | 2 | 67 |
| HMMPfam_Gal-bind_lectin | 6 | 5 | 4 | 2 | 67 |
| HMMPfam_Keratin_B2 | 6 | 5 | 4 | 2 | 67 |
| HMMPfam_Snf7 | 6 | 5 | 4 | 2 | 67 |
| HMMPfam_JmjC | 6 | 6 | 4 | 2 | 67 |
| HMMPfam_KH_1 | 6 | 6 | 4 | 2 | 67 |
| HMMPfam_TIMELESS | 6 | 1 | 3 | 3 | 50 |
| HMMPfam_Integrin_beta | 6 | 3 | 3 | 3 | 50 |
| HMMPfam_Glyco_hydro_18 | 6 | 4 | 3 | 3 | 50 |
| HMMPfam_PP2C | 6 | 4 | 3 | 3 | 50 |
| HMMPfam_Ribosomal_S8 | 6 | 4 | 3 | 3 | 50 |
| HMMPfam_Thiolase_N | 6 | 4 | 3 | 3 | 50 |
| HMMPfam_CRAL_TRIO | 6 | 5 | 3 | 3 | 50 |
| HMMPfam_Transglut_C | 6 | 5 | 3 | 3 | 50 |
| HMMPfam_CNH | 6 | 6 | 3 | 3 | 50 |
| HMMPfam_SDF | 6 | 3 | 2 | 4 | 33 |
| HMMPfam_Clathrin | 5 | 2 | 5 | 0 | 100 |
| HMMPfam_Lipase_GDSL | 5 | 2 | 5 | 0 | 100 |
| HMMPfam_Nckap1 | 5 | 2 | 5 | 0 | 100 |
| HMMPfam_14-3-3 | 5 | 3 | 5 | 0 | 100 |
| HMMPfam_BRCT | 5 | 3 | 5 | 0 | 100 |
| HMMPfam_Beach | 5 | 3 | 5 | 0 | 100 |
| HMMPfam_Cation_efflux | 5 | 3 | 5 | 0 | 100 |
| HMMPfam_Ded_cyto | 5 | 3 | 5 | 0 | 100 |
| HMMPfam_Amino_oxidase | 5 | 4 | 5 | 0 | 100 |
| HMMPfam_ArfGap | 5 | 4 | 5 | 0 | 100 |
| HMMPfam_FAT | 5 | 4 | 5 | 0 | 100 |
| HMMPfam_MCM | 5 | 4 | 5 | 0 | 100 |
| HMMPfam_PMG | 5 | 4 | 5 | 0 | 100 |
| HMMPfam_Tropomodulin | 5 | 4 | 5 | 0 | 100 |
| HMMPfam_tRNA-synt_2b | 5 | 4 | 5 | 0 | 100 |
| HMMPfam_CP2 | 5 | 5 | 5 | 0 | 100 |
| HMMPfam_Myb_DNA-binding | 5 | 5 | 5 | 0 | 100 |
| HMMPfam_PHD | 5 | 5 | 5 | 0 | 100 |
| HMMPfam_TNF | 5 | 5 | 5 | 0 | 100 |
| HMMPfam_TF_AP-2 | 5 | 1 | 4 | 1 | 80 |
| HMMPfam_DUF2211 | 5 | 2 | 4 | 1 | 80 |
| HMMPfam_Glyco_transf_54 | 5 | 2 | 4 | 1 | 80 |
| HMMPfam_PHO4 | 5 | 2 | 4 | 1 | 80 |
| HMMPfam_PKD_channel | 5 | 2 | 4 | 1 | 80 |
| HMMPfam_Pacs-1 | 5 | 2 | 4 | 1 | 80 |
| HMMPfam_Tcp11 | 5 | 2 | 4 | 1 | 80 |
| HMMPfam_Ufd2P_core | 5 | 2 | 4 | 1 | 80 |
| HMMPfam_A_deaminase | 5 | 3 | 4 | 1 | 80 |
| HMMPfam_C8 | 5 | 3 | 4 | 1 | 80 |
| HMMPfam_GDI | 5 | 3 | 4 | 1 | 80 |
| HMMPfam_GKAP | 5 | 3 | 4 | 1 | 80 |
| HMMPfam_Glyco_hydro_20 | 5 | 3 | 4 | 1 | 80 |
| HMMPfam_Pellino | 5 | 3 | 4 | 1 | 80 |
| HMMPfam_Recep_L_domain | 5 | 3 | 4 | 1 | 80 |
| HMMPfam_ThiF | 5 | 3 | 4 | 1 | 80 |
| HMMPfam_Vinculin | 5 | 3 | 4 | 1 | 80 |
| HMMPfam_WTX | 5 | 3 | 4 | 1 | 80 |
| HMMPfam_dsrm | 5 | 3 | 4 | 1 | 80 |
| HMMPfam_Amidase_2 | 5 | 4 | 4 | 1 | 80 |
| HMMPfam_GAT | 5 | 4 | 4 | 1 | 80 |
| HMMPfam_GDA1_CD39 | 5 | 4 | 4 | 1 | 80 |
| HMMPfam_Laminin_I | 5 | 4 | 4 | 1 | 80 |
| HMMPfam_Peptidase_M10 | 5 | 4 | 4 | 1 | 80 |
| HMMPfam_Plectin | 5 | 4 | 4 | 1 | 80 |
| HMMPfam_RCC1 | 5 | 4 | 4 | 1 | 80 |
| HMMPfam_SBF | 5 | 4 | 4 | 1 | 80 |
| HMMPfam_START | 5 | 4 | 4 | 1 | 80 |
| HMMPfam_Thioredoxin | 5 | 4 | 4 | 1 | 80 |
| HMMPfam_Annexin | 5 | 5 | 4 | 1 | 80 |
| HMMPfam_CBS | 5 | 5 | 4 | 1 | 80 |
| HMMPfam_Connexin | 5 | 5 | 4 | 1 | 80 |
| HMMPfam_MIF4G | 5 | 5 | 4 | 1 | 80 |
| HMMPfam_NAP | 5 | 5 | 4 | 1 | 80 |
| HMMPfam_NPIP | 5 | 5 | 4 | 1 | 80 |
| HMMPfam_TRAM_LAG1_CLN8 | 5 | 5 | 4 | 1 | 80 |
| HMMPfam_UQ_con | 5 | 5 | 4 | 1 | 80 |
| HMMPfam_GTF2I | 5 | 1 | 3 | 2 | 60 |
| HMMPfam_MAP2_projctn | 5 | 1 | 3 | 2 | 60 |
| HMMPfam_Acid_phosphat_A | 5 | 2 | 3 | 2 | 60 |
| HMMPfam_Biopterin_H | 5 | 2 | 3 | 2 | 60 |
| HMMPfam_V_ATPase_I | 5 | 2 | 3 | 2 | 60 |
| HMMPfam_Calx-beta | 5 | 3 | 3 | 2 | 60 |
| HMMPfam_Choline_kinase | 5 | 3 | 3 | 2 | 60 |
| HMMPfam_Cys_knot | 5 | 3 | 3 | 2 | 60 |
| HMMPfam_GDPD | 5 | 3 | 3 | 2 | 60 |
| HMMPfam_STAT_int | 5 | 3 | 3 | 2 | 60 |
| HMMPfam_BAG | 5 | 4 | 3 | 2 | 60 |
| HMMPfam_DAGK_cat | 5 | 4 | 3 | 2 | 60 |
| HMMPfam_F-box | 5 | 4 | 3 | 2 | 60 |
| HMMPfam_Ferric_reduct | 5 | 4 | 3 | 2 | 60 |
| HMMPfam_PAP2 | 5 | 4 | 3 | 2 | 60 |
| HMMPfam_Pyridoxal_deC | 5 | 4 | 3 | 2 | 60 |
| HMMPfam_Xlink | 5 | 4 | 3 | 2 | 60 |
| HMMPfam_SK_channel | 5 | 2 | 2 | 3 | 40 |
| HMMPfam_MBT | 5 | 3 | 2 | 3 | 40 |
| HMMPfam_Ribosomal_S8e | 5 | 3 | 2 | 3 | 40 |
| HMMPfam_Glyco_hydro_56 | 5 | 4 | 2 | 3 | 40 |
| HMMPfam_VWC | 5 | 4 | 2 | 3 | 40 |
| HMMPfam_TFA | 5 | 5 | 2 | 3 | 40 |
| HMMPfam_TUDOR | 5 | 5 | 2 | 3 | 40 |

Supplemental Table 1. Pfam domains with at least five mutations in the OV dataset. *Pfam annotation was performed on the 19,356 somatic OV variants. Results from the Pfam database are tabulated here, sorted by the total number of mutations affecting each domain. The total number of genes affected, and the division between non-synonymous and synonymous mutations are also reported.*

## Significantly Mutated Domain Analysis

It is possible to manipulate the output of the Pfam Annotation module and provide this modified output as an input to the SMG test algorithm, thereupon discerning significantly mutated domains across the sample set in question. In the SMG algorithm, each variant is attributed to a particular gene, and included in the calculation of the mutation rate (MR) of that gene. This MR is then compared to the background mutation rate (BMR) found across all of the covered space within the regions of interest (ROIs). In order to find significantly mutated domains as opposed to significantly mutated genes, one can simply modify the variant list so that each variant is attributed to a specific domain rather than to a specific gene. In this case, each variant would contribute to the MR of the domain, and if the ROI list was also changed to provide an accurate background space for all domains, then the totality of variants could be used to calculate the BMR across this within-domain space. The SMG algorithm would them compare the per-domain MR to the across-domain BMR and determine significantly mutated domains. Below is a detailed description of how to precisely achieve this goal.

One must first run the Pfam Annotation module on the cohort’s variant list (currently, a MAF file). The Pfam Annotation module appends a column to the end of each input row which labels the domain in which each variant is located. If this column is simply substituted for the column in the variant list which typically contains the gene that a variant is associated with (in a MAF, the first column), then this modified variant list may be used as input to the SMG algorithm. And lastly, the user would need to provide as input a domain-only ROI list. The format is a tab-separated, 4-column file, with each line specifying a chromosome, a region start position, a region stop position, and an associated domain. The domains in the variant list must of course be present in the domain ROI file, or the SMG algorithm will ignore those variants in the analysis. After running the SMG algorithm in normal fashion using these modified inputs, the output will be a list of significantly mutated domains, with associated P-values and FDR calculations.

We performed the above experiment on 284 OV cases. The most significant results are displayed in Supplemental Table 2 below. As might be expected, the P53 and P53_tetramer domains are the most significantly mutated domains in this dataset. This finding is in direct agreement with the discussion in the Results section regarding the Pfam Annotation tool.

Supplemental Table 2:

| **Pfam Domain** | **SNVs** | **Indels** | **Convolution Test P-value** | **Convolution Test FDR** |
| --- | --- | --- | --- | --- |
| P53 | 188 | 36 | 0.00 | 0.00 |
| P53_tetramer | 5 | 5 | 5.86×10-21 | 1.15×10-17 |
| 7tm_1 | 303 | 8 | 2.96×10-13 | 3.86×10-10 |
| I-set | 76 | 0 | 5.65×10-06 | 5.52×10-03 |
| Collagen | 48 | 4 | 1.26×10-05 | 9.83×10-03 |
| zf-C2H2 | 138 | 6 | 2.39×10-05 | 1.56×10-02 |
| Cadherin | 109 | 3 | 3.79×10-05 | 2.12×10-02 |
| Pkinase | 123 | 2 | 8.03×10-05 | 3.48×10-02 |

Supplemental Table 2. Significantly mutated Pfam domains using the SMG algorithm. *By first*

*replacing the gene name in the variant list with the domain name, and then inputting this altered variant list and a domain-specific regions of interest file into MuSiC’s SMG algorithm, a user may calculate which domains are significantly mutated. Shown in this table are the most significantly mutated domains for the 284 OV samples tested.*

## Benchmarking Statistics

In order to provide an example of run-times for the MuSiC suite of tools, we randomly selected 50 samples from the OV dataset to act as a benchmarking dataset. We limited our selection specifically to samples that had been sequenced at The Genome Institute (TGI) at Washington University. We ran each tool on this 50-sample dataset, and have provided both wall-clock times and CPU times for each step in Supplemental Table 3. We performed the calculation of available coverage for the 50 samples across all regions of interest (which are, in this case, all coding regions) in two ways: first, sequentially, thus simulating the results that would be observed on a single CPU, or in a laboratory without access to a large cluster of computers, and secondly, in parallel, where the coverage estimation was performed on each of the 50 samples using separate processors. We also report two instances of running the P-value summations for the SMG test, a module for which we have implemented a user option for dispersing work to multiple processors if multiple processors happen to be available on a particular machine. All analyses in Supplemental Table 3 were performed on CPUs with these typical statistics: 64-bit, 2.8GHz, 6-core Intel Xeon processors with 32-96 GB of memory.

Supplemental Table 3:

| **MuSiC Module** | **Wall Clock Time**  **(HH:MM:SS)** | **CPU Time**  **(HH:MM:SS)** |
| --- | --- | --- |
| SMG Test (Parallelized) | 00:58:50 | 01:11:35 |
| *Parallelized Coverage Assessment* | 00:42:58 | 00:30:16 |
| *Sequential Coverage Assessment* | 35:48:05 | 25:13:21 |
| *BMR Calculations* | 00:01:43 | 00:00:40 |
| *P-value Summations (1 Processor)* | 00:20:05 | 00:20:03 |
| *P-value Summations (8 Processors)* | 00:14:09 | 00:40:39 |
| PathScan (KEGG) | 00:00:46 | 00:00:17 |
| PathScan (Reactome) | 00:00:18 | 00:00:12 |
| Mutation Relation Test (1000 permutations) | 00:00:19 | 00:00:14 |
| Mutation Relation Test (10000 permutations) | 00:01:54 | 00:01:52 |
| Clinical Correlation Test (Categorical Data) | 00:00:06 | 00:00:04 |
| Clinical Correlation Test (Numeric Data) | 00:00:04 | 00:00:03 |
| Clinical Correlation Test (GLM Analysis) | 00:00:02 | 00:00:01 |
| Proximity Analysis | 00:00:04 | 00:00:03 |
| COSMIC/OMIM Analysis | 00:01:28 | 00:01:27 |
| Pfam Annotation | 00:01:59 | 00:01:25 |

Supplemental Table 3. MuSiC Benchmarking Statistics. *For benchmarking purposes, the entire MuSiC suite was run on 50 randomly-selected OV samples. A MAF file was created which contained only the mutations from these 50 samples. The parallelized coverage assessment reflects the average wall-clock and CPU times needed to assess coverage across the 50 samples. The MRT was performed using mutations from 12 significantly-mutated genes determined using the entire 316-sample dataset; also, two different numbers of permutations are quoted here for this analysis. Two numeric clinical data traits per sample, and two categorical clinical data traits per sample were analyzed in the Clinical Correlation Test for numeric and categorical data, respectively. The same clinical data was also used in the GLM analysis, where one categorical clinical trait (vital status) was used as the response variable, three mutated genes from the 50-sample MAF were used separately as variants, and the three other clinical traits were used as covariates.*
