# Supplementary figures and images for: MuSiC: Identifying mutational significance in cancer genomes
Source: HighWire-hosted journal article supplement (doi:10.1101/gr.134635.111), 2012-07-03

Supplemental Figure 1

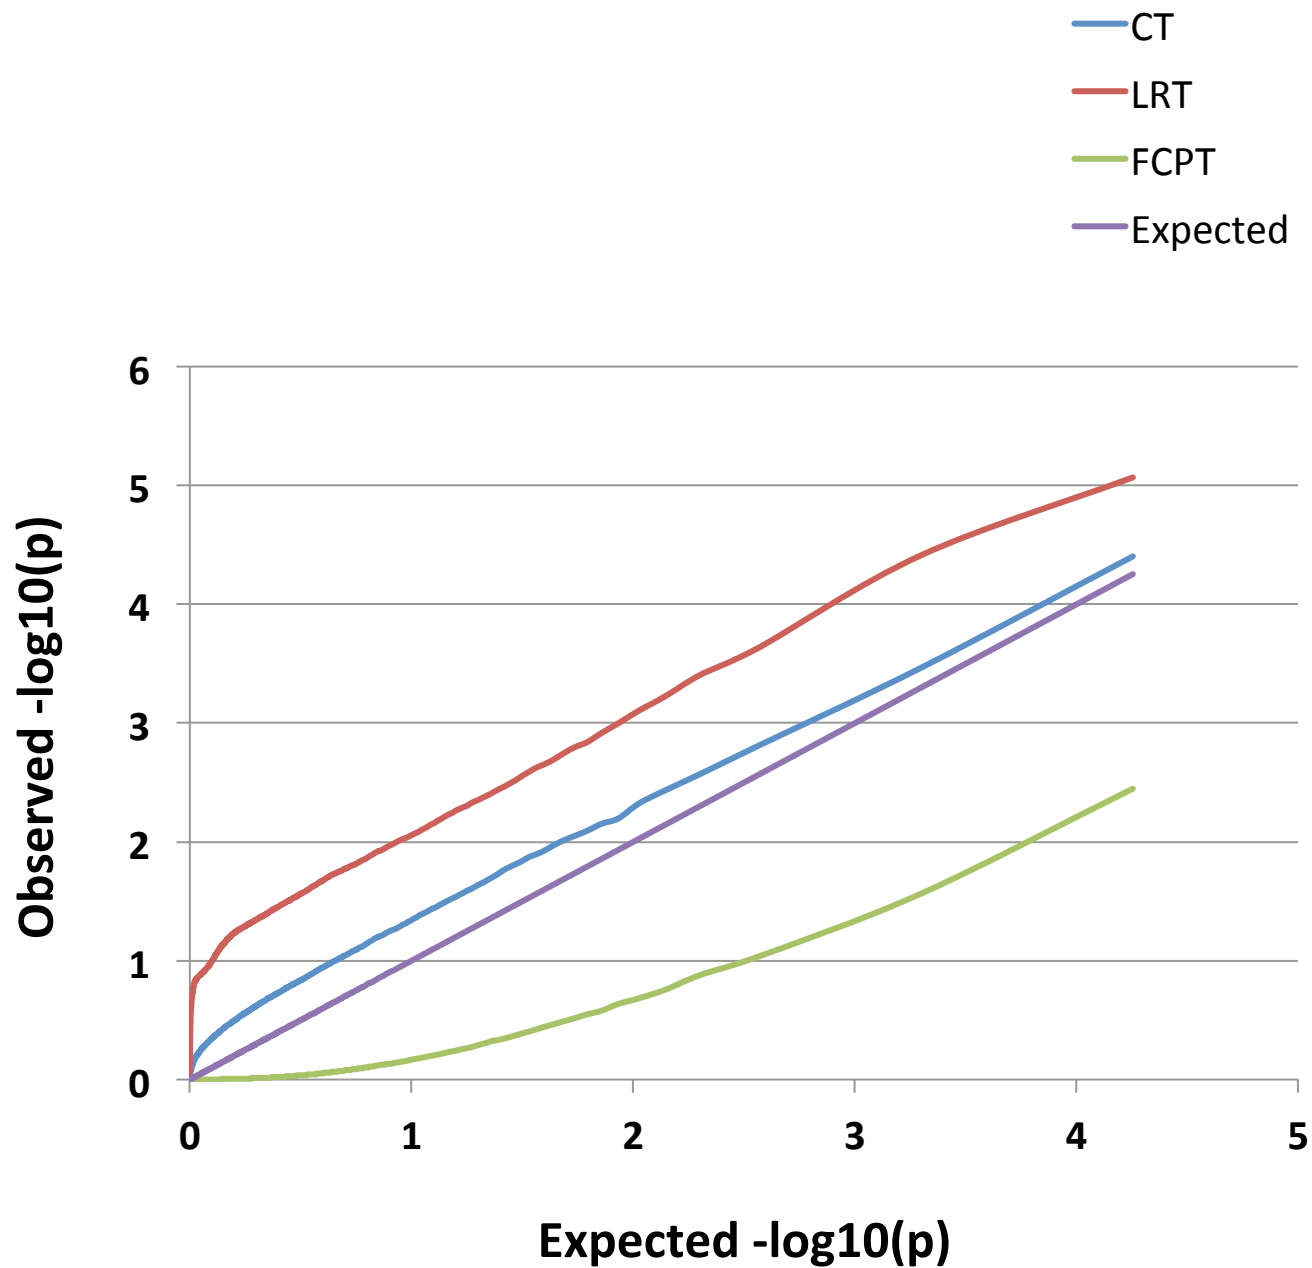

Supplement: supplemental_figure_2.pdf [file supplemental_figure_2.pdf]
